# Supplementary material for: Sustainable Strategies for Synthesizing Lignin-Incorporated Bio-Based Waterborne Polyurethane with Tunable Characteristics
Source: MDPI journal article supplement (doi:10.3390/polym15193987), 2023-10-04
Supplement: s1 [file s1]

# Supplementary Materials: Sustainable Strategies for Synthesizing Lignin-Incorporated Bio-Based Waterborne Polyurethane with Tunable Characteristics

Bo Min Kim, Jin Sil Choi, Sunjin Jang, Hyeji Park, Seung Yeol Lee, Joonhoo Jung and Jaehyeung Park

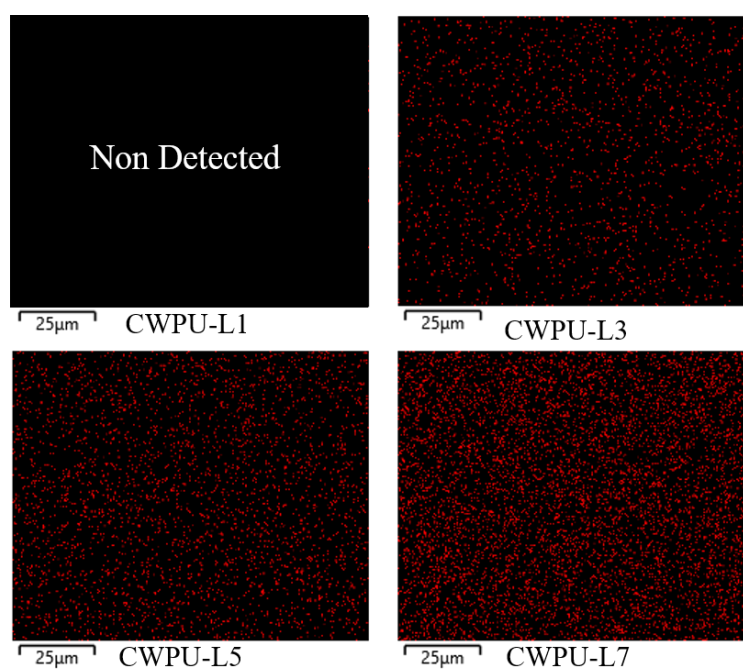

**Figure S1.** Scanning electron microscopy and energy dispersive spectroscopy (SEM-EDS) images of the CWPU-LX films.

The red-marked portion highlights the presence of sulfur within the lignin structure. However, the EDS analysis could not detect the presence of lignin in the CWPU-L1 sample because the lignin content was too low and exceeded the resolution limitations of the technique.
